# Supplementary material for: The Lrat−/− Rat: CRISPR/Cas9 Construction and Phenotyping of a New Animal Model for Retinitis Pigmentosa
Source: MDPI journal article supplement (doi:10.3390/ijms22137234), 2021-07-05
Supplement: s1 [file s1]

# Alignment of wildtype and knockout cDNA sequences

NM\_022290.2 = NCBI reference sequence  
ORF = Open reading frame  
### = Serine

|               |                                                             |     |
|---------------|-------------------------------------------------------------|-----|
| NM_022290.2   | CCGCCAGCGAGAACTCTGGTCTTTAAAGGATGAAGAACTCAATGCTGGAGGCTGCGTCC | 300 |
| ORF           | -----ATGAAGAACTCAATGCTGGAGGCTGCGTCC                         | 30  |
| wildtype_cDNA | -----ATGAAGAACTCAATGCTGGAGGCTGCGTCC                         | 30  |
| Knockout_cDNA | -----ATGAAGAACAGT-TGCTGGAGGCTGCGTCC                         | 29  |
|               | *****###*****                                               |     |

|               |                                                              |     |
|---------------|--------------------------------------------------------------|-----|
| NM_022290.2   | CTCCTTCTGGAGAAGCTGCTCCTTATTTCCAACCTCAAGATCTTTAGCGTGTGCGCCCCG | 360 |
| ORF           | CTCCTTCTGGAGAAGCTGCTCCTTATTTCCAACCTCAAGATCTTTAGCGTGTGCGCCCCG | 90  |
| wildtype_cDNA | CTCCTTCTGGAGAAGCTGCTCCTTATTTCCAACCTCAAGATCTTTAGCGTGTGCGCCCCG | 90  |
| Knockout_cDNA | CTCCTTCTGGAGAAGCTGCTCCTTATTTCCAACCTCAAGATCTTTAGCGTGTGCGCCCCG | 89  |
|               | *****                                                        |     |

|               |                                                              |     |
|---------------|--------------------------------------------------------------|-----|
| NM_022290.2   | GGAGGAGGCACAGGGAAGAAACATCCCTATGAAATCAACTCTTTTCTCCGGGGTGACGTG | 420 |
| ORF           | GGAGGAGGCACAGGGAAGAAACATCCCTATGAAATCAACTCTTTTCTCCGGGGTGACGTG | 150 |
| wildtype_cDNA | GGAGGAGGCACAGGGAAGAAACATCCCTATGAAATCAACTCTTTTCTCCGGGGTGACGTG | 150 |
| Knockout_cDNA | GGAGGAGGCACAGGGAAGAAACATCCCTATGAAATCAACTCTTTTCTCCGGGGTGACGTG | 149 |
|               | *****                                                        |     |

|               |                                                             |     |
|---------------|-------------------------------------------------------------|-----|
| NM_022290.2   | TTGGAAGTGTACGGACCCATTTTACCCACTATGGGATCTACCTGGGGGACAACCGTGTG | 480 |
| ORF           | TTGGAAGTGTACGGACCCATTTTACCCACTATGGGATCTACCTGGGGGACAACCGTGTG | 210 |
| wildtype_cDNA | TTGGAAGTGTACGGACCCATTTTACCCACTATGGGATCTACCTGGGGGACAACCGTGTG | 210 |
| Knockout_cDNA | TTGGAAGTGTACGGACCCATTTTACCCACTATGGGATCTACCTGGGGGACAACCGTGTG | 209 |
|               | *****                                                       |     |

|               |                                                              |     |
|---------------|--------------------------------------------------------------|-----|
| NM_022290.2   | GCCCATCTAATGCCTGACATCCTGTTGGCCCTGACCAGTGACAAGGAACGCACTCAGAAG | 540 |
| ORF           | GCCCATCTAATGCCTGACATCCTGTTGGCCCTGACCAGTGACAAGGAACGCACTCAGAAG | 270 |
| wildtype_cDNA | GCCCATCTAATGCCTGACATCCTGTTGGCCCTGACCAGTGACAAGGAACGCACTCAGAAG | 270 |
| Knockout_cDNA | GCCCATCTAATGCCTGACATCCTGTTGGCCCTGACCAGTGACAAGGAACGCACTCAGAAG | 269 |
|               | *****                                                        |     |

|               |                                                              |     |
|---------------|--------------------------------------------------------------|-----|
| NM_022290.2   | GTGGTCTCCAACAAGCGTCTCCTCCCAGGAGTCATTTGCAAGGTGGCCAGCATCCGTGTG | 600 |
| ORF           | GTGGTCTCCAACAAGCGTCTCCTCCCAGGAGTCATTTGCAAGGTGGCCAGCATCCGTGTG | 330 |
| wildtype_cDNA | GTGGTCTCCAACAAGCGTCTCCTCCCAGGAGTCATTTGCAAGGTGGCCAGCATCCGTGTG | 330 |
| Knockout_cDNA | GTGGTCTCCAACAAGCGTCTCCTCCCAGGAGTCATTTGCAAGGTGGCCAGCATCCGTGTG | 329 |
|               | *****                                                        |     |

|               |                                                              |     |
|---------------|--------------------------------------------------------------|-----|
| NM_022290.2   | GACACAGTAGAGGACTTTGCCTATGGAGCGGACATCCTCGTCAATCACCTAGACGAGACT | 660 |
| ORF           | GACACAGTAGAGGACTTTGCCTATGGAGCGGACATCCTCGTCAATCACCTAGACGAGACT | 390 |
| wildtype_cDNA | GACACAGTAGAGGACTTTGCCTATGGAGCGGACATCCTCGTCAATCACCTAGACGAGACT | 390 |
| Knockout_cDNA | GACACAGTAGAGGACTTTGCCTATGGAGCGGACATCCTCGTCAATCACCTAGACGAGACT | 389 |
|               | *****                                                        |     |

|               |                                                              |     |
|---------------|--------------------------------------------------------------|-----|
| NM_022290.2   | CTCAAGAAGAAGTCCTTGCTCAATGAGGAGGTGGCACGCAGAGCAGAGCAGCAGTTGGGG | 720 |
| ORF           | CTCAAGAAGAAGTCCTTGCTCAATGAGGAGGTGGCACGCAGAGCAGAGCAGCAGTTGGGG | 450 |
| wildtype_cDNA | CTCAAGAAGAAGTCCTTGCTCAATGAGGAGGTGGCACGCAGAGCAGAGCAGCAGTTGGGG | 450 |
| Knockout_cDNA | CTCAAGAAGAAGTCCTTGCTCAATGAGGAGGTGGCACGCAGAGCAGAGCAGCAGTTGGGG | 449 |
|               | *****                                                        |     |

|               |                                                               |     |
|---------------|---------------------------------------------------------------|-----|
| NM_022290.2   | CTGACCCCCTACAGCCTACTGTGGAACAACCTGCGAACACTTTGTGACCTACTGCAGATAC | 780 |
| ORF           | CTGACCCCCTACAGCCTACTGTGGAACAACCTGCGAACACTTTGTGACCTACTGCAGATAC | 510 |
| wildtype_cDNA | CTGACCCCCTACAGCCTACTGTGGAACAACCTGCGAACACTTTGTGACCTACTGCAGATAC | 510 |
| Knockout_cDNA | CTGACCCCCTACAGCCTACTGTGGAACAACCTGCGAACACTTTGTGACCTACTGCAGATAC | 509 |
|               | *****                                                         |     |

|               |                                                               |     |
|---------------|---------------------------------------------------------------|-----|
| NM_022290.2   | GGCTCTCCTATCAGTCCGCAAGGCTGAGAAGTTTACGAGACTGTGAAGATACTCATTCTGT | 840 |
| ORF           | GGCTCTCCTATCAGTCCGCAAGGCTGAGAAGTTTACGAGACTGTGAAGATACTCATTCTGT | 570 |
| wildtype_cDNA | GGCTCTCCTATCAGTCCGCAAGGCTGAGAAGTTTACGAGACTGTGAAGATACTCATTCTGT | 570 |
| Knockout_cDNA | GGCTCTCCTATCAGTCCGCAAGGCTGAGAAGTTTACGAGACTG-----              | 552 |
|               | *****                                                         |     |

|               |                                                             |     |
|---------------|-------------------------------------------------------------|-----|
| NM_022290.2   | GATCAGAGAAGTTGTCTTGCTTCAGTGTCTTGGGATTAGTGTCTATTATCTACACAGGC | 900 |
| ORF           | GATCAGAGAAGTTGTCTTGCTTCAGTGTCTTGGGATTAGTGTCTATTATCTACACAGGC | 630 |
| wildtype_cDNA | TGCTGTGGGTGTCA-----                                         | 584 |
| Knockout_cDNA | -----                                                       | 552 |

# Alignment of wildtype cDNA sequences using forward and reverse primers

NM\_022290.2 = NCBI reference sequence  
ORF = Open reading frame

|                       |                                                               |     |
|-----------------------|---------------------------------------------------------------|-----|
| ORF                   | -----ATGAAGAACTCAATGCTGGAGGCTGCGTCC                           | 30  |
| NM_022290.2           | CCGCCAGCGAGAACTCTGGTCTTTAAAGGATGAAGAACTCAATGCTGGAGGCTGCGTCC   | 300 |
| wildtype_cDNA_forward | -----ATGAAGAACTCAATGCTGGAGGCTGCGTCC                           | 30  |
| wildtype_cDNA_reverse | -----ATGAAGAACTCAATGCTGGAGGCTGCGTCC                           | 30  |
| *****                 |                                                               |     |
| ORF                   | CTCCTTCTGGAGAAGCTGCTCCTTATTTCCAACCTTCAAGATCTTTAGCGTGTGCGCCCCG | 90  |
| NM_022290.2           | CTCCTTCTGGAGAAGCTGCTCCTTATTTCCAACCTTCAAGATCTTTAGCGTGTGCGCCCCG | 360 |
| wildtype_cDNA_forward | CTCCTTCTGGAGAAGCTGCTCCTTATTTCCAACCTTCAAGATCTTTAGCGTGTGCGCCCCG | 90  |
| wildtype_cDNA_reverse | CTCCTTCTGGAGAAGCTGCTCCTTATTTCCAACCTTCAAGATCTTTAGCGTGTGCGCCCCG | 90  |
| *****                 |                                                               |     |
| ORF                   | GGAGGAGGCACAGGGAAGAAACATCCCTATGAAATCAACTCTTTTCTCCGGGTGACGTG   | 150 |
| NM_022290.2           | GGAGGAGGCACAGGGAAGAAACATCCCTATGAAATCAACTCTTTTCTCCGGGTGACGTG   | 420 |
| wildtype_cDNA_forward | GGAGGAGGCACAGGGAAGAAACATCCCTATGAAATCAACTCTTTTCTCCGGGTGACGTG   | 150 |
| wildtype_cDNA_reverse | GGAGGAGGCACAGGGAAGAAACATCCCTATGAAATCAACTCTTTTCTCCGGGTGACGTG   | 150 |
| *****                 |                                                               |     |
| ORF                   | TTGGAAGTGTACGGACCCATTTTACCCACTATGGGATCTACCTGGGGGACAACCGTGTC   | 210 |
| NM_022290.2           | TTGGAAGTGTACGGACCCATTTTACCCACTATGGGATCTACCTGGGGGACAACCGTGTC   | 480 |
| wildtype_cDNA_forward | TTGGAAGTGTACGGACCCATTTTACCCACTATGGGATCTACCTGGGGGACAACCGTGTC   | 210 |
| wildtype_cDNA_reverse | TTGGAAGTGTACGGACCCATTTTACCCACTATGGGATCTACCTGGGGGACAACCGTGTC   | 210 |
| *****                 |                                                               |     |
| ORF                   | GCCCATCTAATGCCTGACATCCTGTTGGCCCTGACCAGTGACAAGGAACGCACTCAGAAG  | 270 |
| NM_022290.2           | GCCCATCTAATGCCTGACATCCTGTTGGCCCTGACCAGTGACAAGGAACGCACTCAGAAG  | 540 |
| wildtype_cDNA_forward | GCCCATCTAATGCCTGACATCCTGTTGGCCCTGACCAGTGACAAGGAACGCACTCAGAAG  | 270 |
| wildtype_cDNA_reverse | GCCCATCTAATGCCTGACATCCTGTTGGCCCTGACCAGTGACAAGGAACGCACTCAGAAG  | 270 |
| *****                 |                                                               |     |
| ORF                   | GTGGTCTCCAACAAGCGTCTCCTCCCAGGAGTCATTTGCAAGGTGGCCAGCATCCGTGTG  | 330 |
| NM_022290.2           | GTGGTCTCCAACAAGCGTCTCCTCCCAGGAGTCATTTGCAAGGTGGCCAGCATCCGTGTG  | 600 |
| wildtype_cDNA_forward | GTGGTCTCCAACAAGCGTCTCCTCCCAGGAGTCATTTGCAAGGTGGCCAGCATCCGTGTG  | 330 |
| wildtype_cDNA_reverse | GTGGTCTCCAACAAGCGTCTCCTCCCAGGAGTCATTTGCAAGGTGGCCAGCATCCGTGTG  | 330 |
| *****                 |                                                               |     |
| ORF                   | GACACAGTAGAGGACTTTGCCTATGGAGCGGACATCCTCGTCAATCACCTAGACGAGACT  | 390 |
| NM_022290.2           | GACACAGTAGAGGACTTTGCCTATGGAGCGGACATCCTCGTCAATCACCTAGACGAGACT  | 660 |
| wildtype_cDNA_forward | GACACAGTAGAGGACTTTGCCTATGGAGCGGACATCCTCGTCAATCACCTAGACGAGACT  | 390 |
| wildtype_cDNA_reverse | GACACAGTAGAGGACTTTGCCTATGGAGCGGACATCCTCGTCAATCACCTAGACGAGACT  | 390 |
| *****                 |                                                               |     |
| ORF                   | CTCAAGAAGAAGTCCTTGCTCAATGAGGAGGTGGCACGCAGAGCAGAGCAGCAGTTGGGG  | 450 |
| NM_022290.2           | CTCAAGAAGAAGTCCTTGCTCAATGAGGAGGTGGCACGCAGAGCAGAGCAGCAGTTGGGG  | 720 |
| wildtype_cDNA_forward | CTCAAGAAGAAGTCCTTGCTCAATGAGGAGGTGGCACGCAGAGCAGAGCAGCAGTTGGGG  | 450 |
| wildtype_cDNA_reverse | CTCAAGAAGAAGTCCTTGCTCAATGAGGAGGTGGCACGCAGAGCAGAGCAGCAGTTGGGG  | 450 |
| *****                 |                                                               |     |
| ORF                   | CTGACCCCCTACAGCCTACTGTGGAACAACCTTGTGACCTACTGCAGATAC           | 510 |
| NM_022290.2           | CTGACCCCCTACAGCCTACTGTGGAACAACCTTGTGACCTACTGCAGATAC           | 780 |
| wildtype_cDNA_forward | CTGACCCCCTACAGCCTACTGTGGAACAACCTTGTGACCTACTGCAGATAC           | 510 |
| wildtype_cDNA_reverse | CTGACCCCCTACAGCCTACTGTGGA-----                                | 475 |
| *****                 |                                                               |     |
| ORF                   | GGCTCTCCTATCAGTCCGCGAGGCTGAGAAGTTTACGAGACTGTGAAGATACTCATTTCGT | 570 |
| NM_022290.2           | GGCTCTCCTATCAGTCCGCGAGGCTGAGAAGTTTACGAGACTGTGAAGATACTCATTTCGT | 840 |
| wildtype_cDNA_forward | GGCTCTCCTATCAGTCCGCGAGGCTGAGAAGTTTACGAGACTGTGAAGAGAGCCGTA     | 570 |
| wildtype_cDNA_reverse | -----                                                         | 475 |
| *****                 |                                                               |     |
| ORF                   | GATCAGAGAAGTTGTCTTGCTTCAGCTGTCTTGGGATTAGTGTCTATTATCTACACAGGC  | 630 |
| NM_022290.2           | GATCAGAGAAGTTGTCTTGCTTCAGCTGTCTTGGGATTAGTGTCTATTATCTACACAGGC  | 900 |
| wildtype_cDNA_forward | TGCTGTGGGTGTCA-----                                           | 584 |
| wildtype_cDNA_reverse | -----                                                         | 475 |

# Alignment of knockout cDNA sequences using forward and reverse primers

NM\_022290.2 = NCBI reference sequence  
ORF = Open reading frame  
### = Serine

|                       |                                                                       |     |
|-----------------------|-----------------------------------------------------------------------|-----|
| NM_022290.2           | CCGCCAGCGAGAAACTCTGGTCTTTAAAGGATGAAGAACTCAATGCTGGAGGCTGCGTCC          | 300 |
| ORF                   | -----ATGAAGAACTCAATGCTGGAGGCTGCGTCC                                   | 30  |
| Knockout_cDNA_forward | -----ATGAAGAACAGT-TGCTGGAGGCTGCGTCC                                   | 28  |
| Knockout_cDNA_reverse | -----ATGAAGAACAGT-TGCTGGAGGCTGCGTCC<br>*****###*****                  | 29  |
| NM_022290.2           | CTCCTTCTGGAGAAGCTGCTCCTTATTTCCAACCTCAAGATCTTTAGCGTGTGCGCCCCG          | 360 |
| ORF                   | CTCCTTCTGGAGAAGCTGCTCCTTATTTCCAACCTCAAGATCTTTAGCGTGTGCGCCCCG          | 90  |
| Knockout_cDNA_forward | CTCCTTCTGGAGAAGCTGCTCCTTATTTCCAACCTCAAGATCTTTAGCGTGTGCGCCCCG          | 88  |
| Knockout_cDNA_reverse | CTCCTTCTGGAGAAGCTGCTCCTTATTTCCAACCTCAAGATCTTTAGCGTGTGCGCCCCG<br>***** | 89  |
| NM_022290.2           | GGAGGAGGCACAGGGAAGAAACATCCCTATGAAATCAACTCTTTTCTCCGGGTGACGTG           | 420 |
| ORF                   | GGAGGAGGCACAGGGAAGAAACATCCCTATGAAATCAACTCTTTTCTCCGGGTGACGTG           | 150 |
| Knockout_cDNA_forward | GGAGGAGGCACAGGGAAGAAACATCCCTATGAAATCAACTCTTTTCTCCGGGTGACGTG           | 148 |
| Knockout_cDNA_reverse | GGAGGAGGCACAGGGAAGAAACATCCCTATGAAATCAACTCTTTTCTCCGGGTGACGTG<br>*****  | 149 |
| NM_022290.2           | TTGGAAGTGTACGGACCCATTTTACCCACTATGGGATCTACCTGGGGGACAACCGTGTC           | 480 |
| ORF                   | TTGGAAGTGTACGGACCCATTTTACCCACTATGGGATCTACCTGGGGGACAACCGTGTC           | 210 |
| Knockout_cDNA_forward | TTGGAAGTGTACGGACCCATTTTACCCACTATGGGATCTACCTGGGGGACAACCGTGTC           | 208 |
| Knockout_cDNA_reverse | TTGGAAGTGTACGGACCCATTTTACCCACTATGGGATCTACCTGGGGGACAACCGTGTC<br>*****  | 209 |
| NM_022290.2           | GCCCATCTAATGCCTGACATCCTGTTGGCCCTGACCAGTGACAAGGAACGCACTCAGAAG          | 540 |
| ORF                   | GCCCATCTAATGCCTGACATCCTGTTGGCCCTGACCAGTGACAAGGAACGCACTCAGAAG          | 270 |
| Knockout_cDNA_forward | GCCCATCTAATGCCTGACATCCTGTTGGCCCTGACCAGTGACAAGGAACGCACTCAGAAG          | 268 |
| Knockout_cDNA_reverse | GCCCATCTAATGCCTGACATCCTGTTGGCCCTGACCAGTGACAAGGAACGCACTCAGAAG<br>***** | 269 |
| NM_022290.2           | GTGGTCTCCAACAAGCGTCTCCTCCCAGGAGTCATTTGCAAGGTGGCCAGCATCCGTGTG          | 600 |
| ORF                   | GTGGTCTCCAACAAGCGTCTCCTCCCAGGAGTCATTTGCAAGGTGGCCAGCATCCGTGTG          | 330 |
| Knockout_cDNA_forward | GTGGTCTCCAACAAGCGTCTCCTCCCAGGAGTCATTTGCAAGGTGGCCAGCATCCGTGTG          | 328 |
| Knockout_cDNA_reverse | GTGGTCTCCAACAAGCGTCTCCTCCCAGGAGTCATTTGCAAGGTGGCCAGCATCCGTGTG<br>***** | 329 |
| NM_022290.2           | GACACAGTAGAGGACTTTGCCTATGGAGCGGACATCCTCGTCAATCACCTAGACGAGACT          | 660 |
| ORF                   | GACACAGTAGAGGACTTTGCCTATGGAGCGGACATCCTCGTCAATCACCTAGACGAGACT          | 390 |
| Knockout_cDNA_forward | GACACAGTAGAGGACTTTGCCTATGGAGCGGACATCCTCGTCAATCACCTAGACGAGACT          | 388 |
| Knockout_cDNA_reverse | GACACAGTAGAGGACTTTGCCTATGGAGCGGACATCCTCGTCAATCACCTAGACGAGACT<br>***** | 389 |
| NM_022290.2           | CTCAAGAAGAAGTCCTTGCTCAATGAGGAGGTGGCACGCAGAGCAGAGCAGCAGTTGGGG          | 720 |
| ORF                   | CTCAAGAAGAAGTCCTTGCTCAATGAGGAGGTGGCACGCAGAGCAGAGCAGCAGTTGGGG          | 450 |
| Knockout_cDNA_forward | CTCAAGAAGAAGTCCTTGCTCAATGAGGAGGTGGCACGCAGAGCAGAGCAGCAGTTGGGG          | 448 |
| Knockout_cDNA_reverse | CTCAAGAAGAAGTCCTTGCTCAATGAGGAGGTGGCACGCAGAGCAGAGCAGCAGTTGGGG<br>***** | 449 |
| NM_022290.2           | CTGACCCCCTACAGCCTACTGTGGAACAACCTGCGAACACTTTGTGACCTACTGCAGATAC         | 780 |
| ORF                   | CTGACCCCCTACAGCCTACTGTGGAACAACCTGCGAACACTTTGTGACCTACTGCAGATAC         | 510 |
| Knockout_cDNA_forward | CTGACCCCCTACAGCCTACTGTGGAACAACCTGCGAACACTTTGTGACCTACTGCAGATAC         | 508 |
| Knockout_cDNA_reverse | CTGACCCCCTACAGCCTACTGTG-----<br>*****                                 | 473 |
| NM_022290.2           | GGCTCTCCTATCAGTCCGCGAGGCTGAGAAGTTTCACGAGACTGTGAAGATACTCATTCGT         | 840 |
| ORF                   | GGCTCTCCTATCAGTCCGCGAGGCTGAGAAGTTTCACGAGACTGTGAAGATACTCATTCGT         | 570 |
| Knockout_cDNA_forward | GGCTCTCCTATCAGTCCGCGAGGCTGAGAAGTTTCACGAGACTGA-----                    | 552 |
| Knockout_cDNA_reverse | -----                                                                 | 473 |

Alignment of the wildtype human and rat Lrat ORF nucleotide sequences

|            |                                                              |     |
|------------|--------------------------------------------------------------|-----|
| LRAT_human | ATGAAGAACCCCATGCTGGAGGTGGTGTCTTTACTACTGGAGAAGCTGCTCCTCATCTCC | 60  |
| Lrat_rat   | ATGAAGAACTCAATGCTGGAGGCTCGTCCCTCCTTCTGGAGAAGCTGCTCCTTATTTCC  | 60  |
|            | ***** * ***** * ** * * ***** ** **                           |     |
| LRAT_human | AACTTCACGCTCTTTAGTTCGGGCGCCGGGCGAAGACAAAGGGAGGAACAGTTTTTAT   | 120 |
| Lrat_rat   | AACTTCAAGATCTTTAGCGTGTGCGCCCCGGGAGGAGGCACAGGAAGAAACATCCCTAT  | 120 |
|            | ***** * ***** * ***** ** * * * ***** ** * **                 |     |
| LRAT_human | GAAACCAGCTCTTTCCACCGAGGCGACGTGCTGGAGGTGCCCCGGACCCACCTGACCCAC | 180 |
| Lrat_rat   | GAAATCAACTCTTTTCTCGGGGTGACGTGTTGGAAGTGTACGGACCCATTTTACCCAC   | 180 |
|            | **** * ***** * ** * * ***** ** * * ***** * *****             |     |
| LRAT_human | TATGGCATCTACCTAGGAGACAACCGTGTGCCACATGATGCCCCGACATCCTGTTGGCC  | 240 |
| Lrat_rat   | TATGGGATCTACCTGGGGGACAACCGTGTGCGCCATCTAATGCCTGACATCCTGTTGGCC | 240 |
|            | ***** ***** * ***** ***** * ***** *****                      |     |
| LRAT_human | CTGACAGACGACATGGGGCGCAGCAGAAAGTGGTCTCCAACAAGCGTCTCATCCTGGGC  | 300 |
| Lrat_rat   | CTGACCAGTGACAAGGAACGCACTCAGAAAGTGGTCTCCAACAAGCGTCTCCTCCCAGGA | 300 |
|            | ***** ** * * ***** ***** ***** ** *                          |     |
| LRAT_human | GTTATTGTCAAAGTGGCCAGCATCCGCTGGACACAGTGGAGGACTTCGCCTACGGAGCT  | 360 |
| Lrat_rat   | GTCATTTGCAAGGTGGCCAGCATCCGTGTGGACACAGTAGAGGACTTTGCCTATGGAGCG | 360 |
|            | ** * * * * ***** ***** ***** ***** *****                     |     |
| LRAT_human | AACATCCTGGTCAATCACCTGGACGAGTCCCTCCAGAAAAAGGCACTGCTCAACGAGGAG | 420 |
| Lrat_rat   | GACATCCCTGTCATCACCTAGACGAGACTCTCAAGAAGAAGTCCTTGCTCAATGAGGAG  | 420 |
|            | ***** ***** ***** * * * * * * * * *****                      |     |
| LRAT_human | GTGGCGCGGAGGGCTGAAAAGCTGCTGGGCTTTACCCCTACAGCCTGCTGTGGAACAAC  | 480 |
| Lrat_rat   | GTGGCACGCAGAGCAGAGCAGAGTTGGGGTGACCCCTACAGCCTACTGTGGAACAAC    | 480 |
|            | ***** * * * * * * * * * * ***** ***** *****                  |     |
| LRAT_human | TGCGAGCACTTCGTGACCTACTGCAGATATGGCACCCCGATCAGTCCCAGTCCGACAAG  | 540 |
| Lrat_rat   | TGCGAACACTTTGTGACCTACTGCAGATACGGCTCTCCTATCAGTCCGAGGCTGAGAAG  | 540 |
|            | ***** ***** ***** ***** * * * * ***** ** * * *               |     |
| LRAT_human | TTTTGTGAGACTGTGAAGATAATTATTCGTGATCAGAGAAGTGTTCTTGCTTCAGCAGTC | 600 |
| Lrat_rat   | TTTCACGAGACTGTGAAGATACTCATTCGTGATCAGAGAAGTTGTCTTGCTTCAGCTGTC | 600 |
|            | *** ***** * ***** ***** ***** ***** **                       |     |
| LRAT_human | TTGGGATTGGCGTCTATAGTCTGTACGGGCTTGGTATCATACACTACCTTCCTGCAATT  | 660 |
| Lrat_rat   | TTGGGATTAGTGTCTATTATCTACACAGGCCCTGGCATCATATATGACCTTCCTGCAGTC | 660 |
|            | ***** * ***** ** * * * * * * * * * * ***** *                 |     |
| LRAT_human | TTTATTCATTCTTCCTATGGAT---GGCTGGCTAA                          | 693 |
| Lrat_rat   | TGCATCCCGTTCTGCTTGTGGATGATGCTGGCTAG                          | 696 |
|            | * * * * * * * * * * * * * * * * *                            |     |

#### Alignment of the wildtype human and rat LRAT ORF amino acid sequences

\* = The same amino acid  
: = Indicates conservation between groups of strongly similar properties  
. = Indicates conservation between groups of weakly similar properties

|            |                                                            |     |
|------------|------------------------------------------------------------|-----|
| LRAT_human | MKNPMLLEVSLLEKLLISNFTLFSSGAAGEDKGRNSFYETSSFHRGDVLEVPRTLTH  | 60  |
| Lrat_rat   | MKNSMLEAASLLLEKLLISNFKIFSVCAPGGGTGKKHPYEINSFLRGDVLEVSRTHTH | 60  |
|            | *** **_.*****.:** ** _.:** ** ***** **_.**                 |     |
| LRAT_human | YGIYLGDNRAHMPDILLALTDDMGRTQKVVSNNKRLILGVIVKVASIRVDTVDFAYGA | 120 |
| Lrat_rat   | YGIYLGDNRAHMLPDILLALTSKERTQKVVSNNKRLPGVICKVASIRVDTVDFAYGA  | 120 |
|            | *****.*****.* *****.*** *****                              |     |
| LRAT_human | NILVNHLDLQKALLNEEVARRAEKLLGFTPYSLWNNCEHFVTCRYGTPISPQSDK    | 180 |
| Lrat_rat   | DILVNHLDLTKKSLNEEVARRAEQLGLTPYSLWNNCEHFVTCRYGSPISPQAEK     | 180 |
|            | :*****.:.:**.*****.:.**.******.*****.*****.:.*             |     |
| LRAT_human | FCETVKIIRDQRSVLASAVLGLASIVCTGLVSYTTLPAIFIPFFLWMAG-         | 230 |
| Lrat_rat   | FHETVKILIRDQRSCLASAVLGLVSIYTGSLASYMTLPAVCIPFCLWMMSG        | 231 |
|            | * *****.***** *****.:.**.* ** *****.*** ** *               |     |

#### Alignment of the mutant human and rat LRAT ORF nucleotide sequences

|            |                                                             |     |
|------------|-------------------------------------------------------------|-----|
| LRAT_human | ATGAAGAACCATGCTGGAGGTGGTGTCTTTACTACTGGAGAAGCTGCTCCTCATCTCCA | 60  |
| Lrat_rat   | ATGAAGAACTCATGCTGGAGGTGCGTCCCTCCTTCTGGAGAAGCTGCTCCTTATTCCA  | 60  |
|            | ***** ***** * ** * ** ***** ***** ** *                      |     |
| LRAT_human | ACTTCACGCTCTTTAGTTCGGGCGCCGCGGGCGAAGACAAAGGGAGGAACAGTTTTATG | 120 |
| Lrat_rat   | ACTTCAAGATCTTTAGCGTGTGCGCCCGGGAGGAGGCACAGGGAAGAAACATCCCTATG | 120 |
|            | ***** * ***** * ***** ***** * ** * ** ***** ***** * *****   |     |
| LRAT_human | AAACCAGCTCTTTCCACCGAGGCGACGTGCTGGAGGTGCCCCGGACCCACCTGA----- | 174 |
| Lrat_rat   | AAATCAACTCTTTCTCCGGGGTGACGTGTTGGAAGTGTCACGGACCCATTTACCCACT  | 180 |
|            | *** ** ***** * ** * ** ***** ***** ***** * ***** * *        |     |
| LRAT_human | -----                                                       | 174 |
| Lrat_rat   | ATGGGATCTACCTGGGGGACAACCGTGTGCCCCATCTAA                     | 219 |

#### Alignment of the mutant human and rat LRAT theoretic ORF amino acid sequences

\* = The same amino acid  
: = Indicates conservation between groups of strongly similar properties  
. = Indicates conservation between groups of weakly similar properties

|            |                                                               |    |
|------------|---------------------------------------------------------------|----|
| LRAT_human | MKNPCWRWCLYYWRSCSSSPTSRSLSVRAPRAKTKGGTVFMKPALSTEATCWRCPGPT--- | 57 |
| LRAT_rat   | MKNSCWRLRPSFWRSCSLFPTSRLACAPREEAQGRNIPMKSTLFSGVTCWKCHGPILPT   | 60 |
|            | *** ** :***** *****. *** ::* .: ** :* :.***:* **              |    |
| LRAT_human | -----                                                         | 57 |
| LRAT_rat   | MGSTWGTTVSPI                                                  | 72 |
